# Supplementary material
Source: Royal Society of Chemistry journal article supplement (doi:10.1039/d6pm00129g)
Supplement: d6pm00129g1.pdf [file d6pm00129g1.pdf]

# Dynamic Vapor Sorption for Quality Assessment of Pharmaceutical Coatings: A Case Study in Enteric Protection

Jesús Alberto Afonso Urich <sup>1,\*</sup>, Michael Piller <sup>1</sup>, Anna Fedorko <sup>1</sup>, Anna Sophie Neubauer <sup>1</sup> and Raymar Andreina Lara García <sup>1</sup>

<sup>1</sup> Research Center Pharmaceutical Engineering GmbH, 8010 Graz, Austria; michael.piller@rcpe.at (M.P.); anna.fedorko@rcpe.at (A.F.); anna.neubauer@rcpe.at (A.S.N.); and raymar.lara@rcpe.at (R.A.L.G.)

\* Correspondence: jesus.afonso@rcpe.at (J.A.A.U.); Tel.: +43-316-873-30988

## 1. Methodology

### Tablet Manufacturing and Coating Procedure

The tablet blend was prepared using a Rhönrad-type hoop mixer (J. Engelsmann AG, Germany) operated at 28 rpm for 20 minutes to ensure uniform distribution of excipients. Subsequently, sodium stearyl fumarate was incorporated as a lubricant and the mixture was subjected to an additional 5-minute blending cycle. Compression of the final blend was performed using a rotary tablet press (Model Fette 102i, Fette Compacting GmbH, Schwarzenbek, Germany) fitted with eight 8-mm concave punches (Adamus S.A., Szczecin, Poland).

Film coating was carried out in a Solidlab 1 coating system (Syntegon Technology GmbH, Waiblingen, Germany), using a 951 Form 7-1 S24 ABC spray gun (Düsen-Schlick GmbH, Germany). For each coating batch, 400 g of tablets were processed. Coating dispersions were prepared according to manufacturer specifications and homogenized with an IKA® Ministar 20 overhead stirrer (Breisgau, Germany) at controlled agitation speeds and time (*Table S1*). The rationale for these parameters was based on supplier recommendations and prior experimental experience. (1–4)

*Table S1. Preparation parameters of applied coating suspensions*

| <i>Parameter</i>                          | <i>Opadry® II</i> | <i>Acryl-Eze®® II</i> | <i>Aquarius™ Control ENA</i> | <i>Nutrateric®</i>                  |
|-------------------------------------------|-------------------|-----------------------|------------------------------|-------------------------------------|
| <i>% weight coating in purified water</i> | 8                 | 20                    | 20                           | 1.5% NS<br>Enteric 34%<br>Surelease |
| <i>Agitation (rpm)</i>                    | 410               | 430                   | 390                          | 400                                 |
| <i>Homogenization time (min)</i>          | 45                | 20                    | 60                           | 90                                  |
| <i>Final Sieve mesh (µm)</i>              | 250               | 250                   | 800                          | Not applicable                      |

A protective sub-coating layer of Opadry® II was applied prior to the enteric coating. This step was necessary to prevent potential degradation of omeprazole caused by interaction with aqueous enteric polymers, particularly polymethacrylate-based systems known to contain methacrylic acid moieties. The sub-coat served as a barrier between the API core and the enteric layer.

Three enteric coating formulations (Acryl-EZE® II, Aquarius™ Control ENA, and Nutrateric®) were applied using process parameters optimized from initial trial runs and guided by manufacturer recommendations. Parameters such as spray rate, atomization pressure, inlet/outlet temperature, drum rotation speed, and target weight gain are described in *Table S2*. More details on the manufacturing process and evaluation are literature (2,5,6).

*Table S2. Summary of applied in-process coating parameters. located in lit*

| <i>Parameter</i>                       | <i>Opadry® II<br/>(sub coat)</i> | <i>Acryl-Eze®<br/>II</i> | <i>Aquarius™<br/>Control ENA</i> | <i>Nutrateric®</i> |
|----------------------------------------|----------------------------------|--------------------------|----------------------------------|--------------------|
| <i>Spray Rate (g/min)</i>              | 3.5                              | 1.5                      | 1.5                              | 3.0                |
| <i>Atomizing pressure (bar)</i>        | 0.8                              | 0.8                      | 1.0                              | 0.8                |
| <i>Preheat outlet temperature (°C)</i> | 42                               | 32                       | 40                               | 45                 |
| <i>Inlet temperature (°C)</i>          | 70                               | 52                       | 63                               | 70                 |
| <i>Outlet temperature (°C)</i>         | 40                               | 36                       | 42                               | 45                 |
| <i>Drum speed (rpm)</i>                | 30                               | 30                       | 30                               | 20                 |
| <i>Weight gain (%)</i>                 | 2                                | 5-12                     | 3-12                             | 1-10               |

During process development, pan loading and spray conditions were adjusted to prevent over-wetting and edge build-up. Tablets were inspected visually, and the OCT images confirmed uniform coverage without edging or collar formation.

### Analytical Methods (Content determination and dissolution).

Table S3. Chromatographic methodology conditions for the omeprazole content determination and dissolution.

| <i>Chromatographic feature</i> | <i>Content determination and dissolution</i>                                                                                    |
|--------------------------------|---------------------------------------------------------------------------------------------------------------------------------|
| <i>Mobile phases</i>           | A: 10 mM ammonium bicarbonate buffer pH 8.75<br>B: Acetonitrile                                                                 |
| <i>Gradient program</i>        | %A <sub>0min</sub> =90, %A <sub>3min</sub> =90, %A <sub>10min</sub> =40, %A <sub>11min</sub> =90 and<br>%A <sub>15min</sub> =90 |
| <i>Flow</i>                    | 1.9 ml/min                                                                                                                      |
| <i>Injection volume</i>        | 5 µl (content uniformity, assay)<br>40 µl (dissolution)                                                                         |
| <i>Time per injection</i>      | 15 min                                                                                                                          |
| <i>Column temperature</i>      | 35 °C                                                                                                                           |
| <i>Sample temperature</i>      | 20 °C                                                                                                                           |
| <i>Detector wavelength</i>     | 305 nm                                                                                                                          |

Table S4. Summary of analytical validation results for omeprazole quantification by UPLC and coating thickness determination by OCT.

| <b>Attribute</b>      | <b>Result (UPLC)</b> | <b>Result (OCT)*</b> |
|-----------------------|----------------------|----------------------|
| <i>Mean precision</i> | RSD=0.9%             | RSD=2.2%             |
| <i>Mean Accuracy</i>  | Recovery=97.7%       | Recovery=99.8%       |
| <i>Sensitivity</i>    | 0.02%                | 3.2 µm               |

\*The results are taken from previously published studies (7)

## 2. Results and Discussion

### Coating Thickness and dissolution determination in the acid stage

Table S5. Exponential fitting parameters for acid-stage dissolution performance of enteric-coated tablets.

| <b>Formulation prototype</b> | <b>Equation</b>     | <b>R<sup>2</sup></b> |
|------------------------------|---------------------|----------------------|
| <i>Acryl-Eze®</i>            | $63.315e^{-0.039x}$ | 0.9991               |
| <i>Aquarius™ control ENA</i> | $71.846e^{-0.033x}$ | 0.9974               |

### 3. References

1. Afonso Ulrich JA, Wolfgang M, Lara Garcia RA, West H, Khinast J. Technical and regulatory perspective on acid stage dissolution assessed via optical coherence tomography (Part 1: Release Scenario). *Int J Pharm.* 2025 Oct;683:126044. doi:10.1016/j.ijpharm.2025.126044
2. Colorcon Inc. Nutrateric Nutritional Enteric Coating System - Application Data [Internet]. [cited 2025 Mar 10]. Available from: <https://www.google.com/url?sa=t&source=web&rct=j&opi=89978449&url=https://www.colorconventures.com/jp/component/flexicontent/download/494/2327/34&ved=2ahUKEwiFIK3K0v-LAxXg1QIHHSUTAh4QFnoECBAQAQ&usg=AOvVaw1xMy2hSabpVM1xWG03ISIt>
3. Colorcon Inc. Acryl-EZE® 93A Preparation and Use Sheet [Internet]. [cited 2024 Sep 12]. Available from: <https://www.colorcon.com/component/flexicontent/item/1981-acryl-eze-93a-preparation-and-use-sheet>
4. Ashland Global Specialty Chemicals Inc. Aquarius™ Control ENA film coating systems Reconstitution Instructions. 2017.
5. Ashland Global Specialty Chemicals Inc. Aquarius™ control film coating systems [Internet]. [cited 2025 Mar 10]. Available from: <https://www.ashland.com/industries/pharmaceutical/film-coating-systems/aquarius-control-film-coating-systems>
6. Colorcon Inc. Acryl-EZE® Coating Parameters [Internet]. [cited 2024 Sep 12]. Available from: <https://www.colorcon.com/component/flexicontent/item/2025-acryl-eze-coating-parameters>
7. Wolfgang M, Peter A, Wahl P, Markl D, Zeitler JA, Khinast JG. At-line validation of optical coherence tomography as in-line/at-line coating thickness measurement method. *Int J Pharm.* 2019 Dec 15;572:118766. doi:10.1016/j.ijpharm.2019.118766 PubMed PMID: 31705973.
